# Supplementary material for: 1-Methylimidazole as an Organic Catalyst for [3+3]-Cyclodimerization of Acylethynylpyrroles to Bis(acylmethylidene)dipyrrolo[1,2-a:1′,2′-d]pyrazines
Source: MDPI journal article supplement (doi:10.3390/catal12121604), 2022-12-07
Supplement: s1 [file s1]

## Supplementary materials

### 1-Methylimidazole as Organic Catalyst for [3+3]-Cyclodimerization of Acylethynylpyrroles to Bis(acylmethyldiene)dipyrrolo[1,2-*a*:1',2'-*d*]pyrazines

Kseniya V. Belyaeva, Lina P. Nikitina, Veronika S. Gen', Denis N. Tomilin, Lyubov N. Sobenina, Andrei V. Afonin, Ludmila A. Oparina and Boris A. Trofimov\*

A.E. Favorsky Irkutsk Institute of Chemistry, Siberian Branch, Russian Academy of Sciences, 1 Favorsky Str., Irkutsk, 664033, Russian Federation

\* Correspondence: [boris\\_trofimov@iriioch.irk.ru](mailto:boris_trofimov@iriioch.irk.ru)

## Contents

|                                                          |    |
|----------------------------------------------------------|----|
| 1. General Experiment                                    | S1 |
| 2. Experimental Procedures, Spectral and Analytical data | S1 |
| 3. References                                            | S8 |
| 4. Copies of NMR Spectra                                 | S9 |

## General Experiment

NMR spectra were recorded on a Bruker DPX-400 spectrometer (400.1 MHz for  $^1\text{H}$  and 100.6 MHz for  $^{13}\text{C}$ ) in  $\text{CDCl}_3$  or  $\text{CD}_3\text{CN}$  (for monitoring). The internal standards were HMDS (for  $^1\text{H}$ ) and the residual solvents signal (for  $^{13}\text{C}$ ). Coupling constants ( $J$ ) were measured from one-dimensional spectra, and multiplicities were abbreviated as follows: s (singlet), d (doublet), dd (doublet of doublets), t (triplet), m (multiplet). IR spectra were recorded on a two-beam Bruker Vertex 70 spectrometer, in a microlyser from chloroform. Mass spectra were recorded on an Agilent 6210 HRMS-TOF-ESI Mass spectrometer. Electrostatic sputtering, registration of positive ions. Sample Solvent - MeCN with the addition of 0.1% heptafluorobutanoic acid and with the addition of calibration mixture for mass spectrometer. Melting points (uncorrected) were measured on a Kofler micro hot-stage apparatus. 1-Methylimidazole was a commercial reagent. Acylethynylpyrroles **1a-f** were obtained according to methods [1]. Column and thin-layer chromatography for isolation and purification of compounds **2** were carried out on silica gel (0.06-0.2 mm) with chloroform/ethanol (20 : 1) mixture as eluent.

## Experimental Procedures, Spectral and Analytical data

*2,2'-(5H,10H-dipyrrolo[1,2-*a*:1',2'-*d*]pyrazine-5,10-diylidene)bis(1-phenylethan-1-one) (2a).*

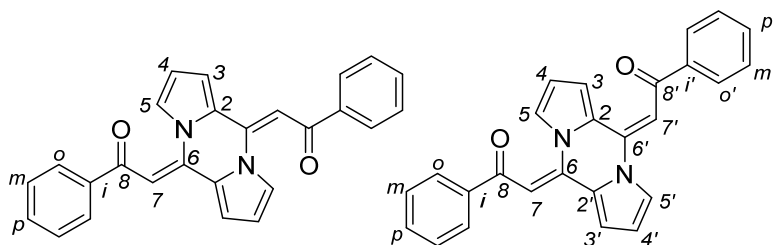

A mixture of benzoylthynylpyrrole (**1a**) (90 mg, 0.5 mmol) and 1-methylimidazole (41 mg, 0.5 mmol) was stirred at 40-45 °C for 24 h. After cooling reaction mixture to room temperature it

was passed through chromatography column affording to dipyrrolo[1,2-*a*:1',2'-*d*]pyrazine **2a** (99 mg, 51%), as an orange gum.

IR (microlayer): 1568 (C=C), 1647 (C=O) cm<sup>-1</sup>.

*E,E:E,Z*-isomer ratio = 70:30 (<sup>1</sup>H NMR). *E,E*-isomer: <sup>1</sup>H NMR (400.13 MHz, CDCl<sub>3</sub>): δ 8.18 (m, 2H, 2 H-3), 7.96 (m, 4H, 2 H<sub>o</sub> from 2 Ph), 7.53 (m, 2H, 2 H<sub>p</sub> from 2 Ph), 7.45 (m, 6H, 2 H-5, 2 H<sub>m</sub> from 2 Ph), 6.92 (s, 2H, 2 H-7), 6.46 (m, 2H, 2 H-4) ppm.

<sup>13</sup>C NMR (100.62 MHz, CDCl<sub>3</sub>): δ 188.5 (2 C-8), 139.9 (2 C<sub>i</sub> from 2 Ph), 136.3 (2 C-2), 132.6 (2 C<sub>p</sub> from 2 Ph), 128.7 (4 C<sub>o</sub> from 2 Ph), 128.3 (4 C<sub>m</sub> from 2 Ph), 123.6 (2 C-6), 120.9 (2 C-5), 120.5 (2 C-3), 113.7 (2 C-4), 105.4 (2 C-7) ppm.

*E,Z*-isomer: <sup>1</sup>H NMR (400.13 MHz, CDCl<sub>3</sub>): δ 8.15 (m, 1H, H-3), 7.96 (m, 4H, H<sub>o,o'</sub> from 2 Ph), 7.53 (m, 2H, H<sub>p,p'</sub> from 2 Ph), 7.45 (m, 6H, H-5, H-5', H<sub>m,m'</sub> from 2 Ph), 6.94 (m, 1H, H-3'), 6.88 (s, 1H, H-7), 6.85 (s, 1H, H-7'), 6.46 (m, 1H, H-4), 6.34 (m, 1H, H-4') ppm.

<sup>13</sup>C NMR (100.62 MHz, CDCl<sub>3</sub>): δ 188.8 (C-8'), 188.7 (C-8), 139.9 (C<sub>i</sub> from Ph), 139.7 (C<sub>i'</sub> from Ph), 135.8 (C-2), 135.0 (C-2'), 132.8 (C<sub>p'</sub> from Ph), 132.6 (C<sub>p</sub> from Ph), 128.7 (C<sub>o,o'</sub> from 2 Ph), 128.3 (C<sub>m,m'</sub> from 2 Ph), 123.6 (C-6), 123.0 (C-6'), 121.1 (C-5'), 120.9 (C-5), 119.7 (C-3), 114.0 (C-3'), 112.4 (C-4), 111.6 (C-4'), 104.3 (C-7), 101.8 (C-7') ppm.

HRMS (ESI-TOF) calcd for [C<sub>26</sub>H<sub>18</sub>N<sub>2</sub>O<sub>2</sub>+H]<sup>+</sup> 391.14465; found 391.1446.

Elemental analysis for C<sub>26</sub>H<sub>18</sub>N<sub>2</sub>O<sub>2</sub> (390.44): calcd. C, 79.98; H, 4.65; N, 7.17; found: C, 79.67; H, 4.64; N, 7.10.

2,2'-(5*H*,10*H*-dipyrrolo[1,2-*a*:1',2'-*d*]pyrazine-5,10-diylidene)bis(1-(furan-2-yl)ethan-1-one) (**2b**).

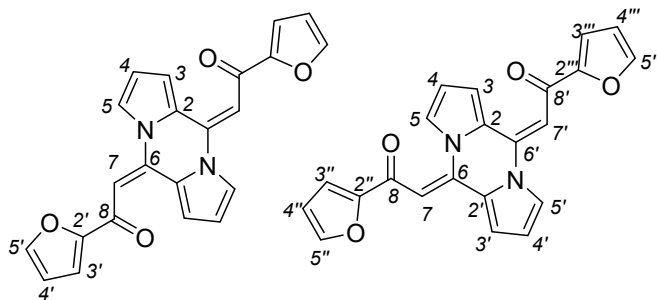

Analogously from (furoyl-2)-ethynylpyrrole (**1b**) (93 mg, 0.5 mmol) and 1-methylimidazole (41 mg, 0.5 mmol), (40-45 °C, 6 h) dipyrrolo[1,2-*a*:1',2'-*d*]pyrazine **2b** was obtained (48 mg, 26%) as a red powder, mp 193-195 °C (MeCN).

IR (microlayer): 1575 (C=C), 1641 (C=O) cm<sup>-1</sup>.

*E,E:E,Z*-isomer ratio = 75:25 (<sup>1</sup>H NMR).

*E,E*-isomer: <sup>1</sup>H NMR (400.13 MHz, CDCl<sub>3</sub>): δ 8.51 (m, 2H, 2 H-3), 7.58 (m, 4H, 2 H-5, 2 H-5'), 7.23 (m, 2H, 2 H-3'), 7.01 (s, 2H, 2 H-7), 6.55 (m, 2H, 2 H-4'), 6.49 (m, 2H, 2 H-4) ppm.

$^{13}\text{C}$  NMR (100.62 MHz,  $\text{CDCl}_3$ ):  $\delta$  175.7 (2 C-8), 155.1 (2 C-2'), 146.7 (2 C-5'), 137.0 (2 C-2), 123.7 (2 C-6), 122.1 (2 C-5), 121.6 (2 C-3), 116.1 (2 C-3'), 113.9 (2 C-4), 112.8 (2 C-4'), 105.4 (2 C-7) ppm.

*E,Z*-isomer:  $^1\text{H}$  NMR (400.13 MHz,  $\text{CDCl}_3$ ):  $\delta$  8.85 (m, 1H, H-5), 8.57 (m, 1H, H-3), 7.03 (s, 1H, H-7), 6.48 (m, 1H, H-4), 6.44 (m, 1H, H-4') ppm, signals of H-3', H-5', H-3'', H-4'', H-5'', H-3''', H-4''', H-5''', H-7' are overlapped by corresponding signals of the major isomer.

Elemental analysis for  $\text{C}_{22}\text{H}_{14}\text{N}_2\text{O}_4$  (370.36): calcd. C, 71.35; H, 3.81; N, 7.56; found: C, 71.47; H, 3.64; N, 7.21.

*2,2'-(5H,10H-dipyrrolo[1,2-*a*:1',2'-*d*]pyrazine-5,10-diylidene)bis(1-(thiophen-2-yl)ethan-1-one)*  
(**2c**)

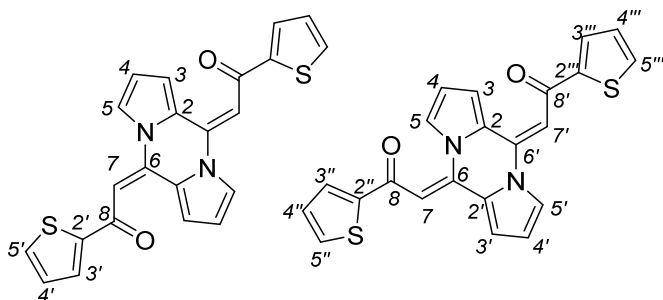

Analogously from (thenoyl-2)-ethynylpyrrole (**1c**) (101 mg, 0.5 mmol) and 1-methylimidazole (41 mg, 0.5 mmol), (40-45 °C, 24 h) dipyrrolo[1,2-*a*:1',2'-*d*]pyrazine **2c** was obtained (46 mg, 23%) as a brown gum.

IR (microlayer): 1568 (C=C), 1629, 1699 (C=O)  $\text{cm}^{-1}$ .

*E,E:E,Z*-isomer ratio = 80:20 ( $^1\text{H}$  NMR).

*E,E*-isomer:  $^1\text{H}$  NMR (400.13 MHz,  $\text{CDCl}_3$ ):  $\delta$  8.31 (m, 2H, 2 H-3), 7.73 (m, 2H, 2 H-5'), 7.60 (m, 2H, 2 H-5), 7.50 (m, 2H, 2 H-4'), 7.12 (m, 2H, 2 H-3'), 6.89 (s, 2H, 2 H-7), 6.50 (m, 2H, 2 H-4) ppm.

$^{13}\text{C}$  NMR (100.62 MHz,  $\text{CDCl}_3$ ):  $\delta$  180.1 (2 C-8), 147.5 (2 C-2'), 136.5 (2 C-2), 133.3 (2 C-5'), 130.9 (2 C-5), 128.4 (2 C-3), 123.7 (2 C-6), 121.5 (2 C-3'), 121.1 (2 C-4), 113.8 (2 C-4'), 104.5 (2 C-7) ppm.

*E,Z*-isomer:  $^1\text{H}$  NMR (400.13 MHz,  $\text{CDCl}_3$ ):  $\delta$  8.75 (m, 1H, H-5), 8.58 (m, 1H, H-3), 7.77 (m, 1H, H-5''), 6.98 (m, 1H, H-3''), 6.91 (s, 1H, H-7), 6.39 (m, 1H, H-4') ppm, signals of H-3', H-5', H-3'', H-4'', H-5'', H-3''', H-4''', H-5''', H-7' are overlapped by corresponding signals of the major isomer.

Elemental analysis for  $\text{C}_{22}\text{H}_{14}\text{N}_2\text{O}_2\text{S}_2$  (402.49): calcd. C, 65.65; H, 3.51; N, 6.96; S, 15.93; found: C, 65.84; H, 3.68; N, 6.56; S, 15.76.

(2*E*,2'*E*)-2,2'-(3,8-dimethyl-5*H*,10*H*-dipyrrolo[1,2-*a*:1',2'-*d*]pyrazine-5,10-diylidene)bis(1-phenylethan-1-one) (**2d**)

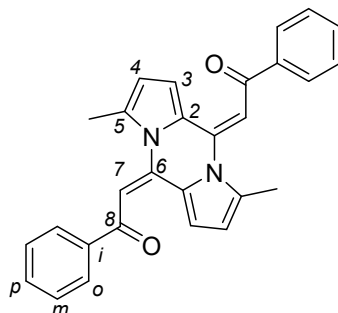

Analogously from benzoylethynylpyrrole **1d** (105 mg, 0.5 mmol) and 1-methylimidazole (41 mg, 0.5 mmol), (40-45 °C, 32 h) dipyrrolo[1,2-*a*:1',2'-*d*]pyrazine **2d** was obtained (48 mg, 23%) as a dark-yellow oil.

IR (microlayer): 1578 (C=C), 1652 (C=O) cm<sup>-1</sup>.

<sup>1</sup>H NMR (400.13 MHz, CDCl<sub>3</sub>): δ 7.91 (m, 4H, H<sub>o</sub> from 2 Ph), 7.80 (d, <sup>3</sup>J<sub>3,4</sub> = 3.6 Hz, 2H, 2 H-3), 7.51 (m, 2H, H<sub>p</sub> from 2 Ph), 7.43 (m, 4H, H<sub>m</sub> from 2 Ph), 6.80 (s, 2H, 2 H-7), 6.21 (d, <sup>3</sup>J<sub>3,4</sub> = 3.6 Hz, 2H, 2 H-4), 2.56 (s, 6H, 2 CH<sub>3</sub>) ppm.

<sup>13</sup>C NMR (100.62 MHz, CDCl<sub>3</sub>): δ 187.9 (2 C-8), 139.6 (2 C<sub>i</sub> from Ph), 137.3 (2 C-2), 132.5 (2 C<sub>p</sub> from 2 Ph, 2 C-5), 128.7 (4 C<sub>m</sub> from 2 Ph), 128.3 (4 C<sub>o</sub> from 2 Ph), 125.1 (2 C-6), 118.1 (2 C-3), 113.5 (2 C-4), 110.2 (2 C-7), 15.8 (2 CH<sub>3</sub>) ppm.

Elemental analysis for C<sub>28</sub>H<sub>22</sub>N<sub>2</sub>O<sub>2</sub> (418.50): calcd. C, 80.36; H, 5.30; N, 6.69; found: C, 79.88; H, 5.79; N, 6.21.

(*E,E*)-2,2'-(5*H*,10*H*-dipyrrolo[1,2-*a*:1',2'-*d*]pyrazine-5,10-diylidene)bis(1-(phenyl)ethan-1-one) (**3e**)

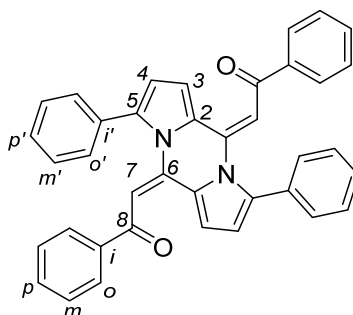

Analogously from benzoylethynylpyrrole **1e** (136 mg, 0.5 mmol) and 1-methylimidazole (41 mg, 0.5 mmol), (40-45 °C, 48 h) dipyrrolo[1,2-*a*:1',2'-*d*]pyrazine **2e** was obtained (68 mg, 25%) as a brown gum.

IR (microlayer): 1543, 1579, 1597 (C=C), 1652 (C=O) cm<sup>-1</sup>.

$^1\text{H}$  NMR (400.13 MHz,  $\text{CDCl}_3$ ):  $\delta$  7.94 (d,  $^3J_{3,4} = 3.6$  Hz, 2H, 2 H-3), 7.56 (m, 4H,  $\text{H}_o$  from 2 Ph), 7.46 (m, 6H,  $\text{H}_{p,m'}$  from 2 Ph), 7.40 (m, 4H,  $\text{H}_m$  from 2 Ph), 7.34 (m, 4H,  $\text{H}_{o'}$  from 2 Ph), 7.25 (m, 2H,  $\text{H}_{p'}$  from 2 Ph), 6.54 (d, 2H, 2 H-4), 6.52 (s, 2H, 2 H-7) ppm.

$^{13}\text{C}$  NMR (100.62 MHz,  $\text{CDCl}_3$ ):  $\delta$  187.7 (2 C-8), 139.5 (2  $\text{C}_i$  from 2 Ph), 136.8 (2 C-2), 135.9 (2  $\text{C}_{i'}$  from 2 Ph), 132.9 (2 C-5), 132.4 (2  $\text{C}_p$  from 2 Ph), 129.3 (4  $\text{C}_m$  from 2 Ph), 128.9 (4  $\text{C}_{o'}$  from 2 Ph), 128.4 (4  $\text{C}_{m'}$  from 2 Ph), 128.2 (2  $\text{C}_{p'}$  from 2 Ph), 127.9 (4  $\text{C}_o$  from 2 Ph), 127.6 (2 C-6), 118.6 (2 C-3), 115.5 (2 C-4), 114.0 (2 C-7) ppm.

Elemental analysis for  $\text{C}_{38}\text{H}_{26}\text{N}_2\text{O}_2$  (542.64): calcd. C, 84.11; H, 4.83; N, 5.16; found: C, 84.04; H, 4.89; N, 5.10.

(2*E*,2'*E*)-2,2'-(3,8-di(thiophen-2-yl)-5*H*,10*H*-dipyrrolo[1,2-*a*:1',2'-*d*]pyrazine-5,10-diylidene)bis(1-phenylethan-1-one) (**2f**)

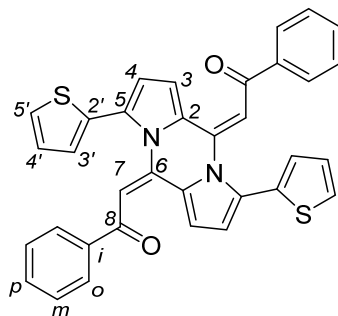

Analogously from benzoylethynylpyrrole **1f** (139 mg, 0.5 mmol) and 1-methylimidazole (41 mg, 0.5 mmol), (40-45 °C, 24 h) dipyrrolo[1,2-*a*:1',2'-*d*]pyrazine **2f** was obtained (130 mg, 47%) as a dark-red gum.

IR (microlayer): 1552, 1582, 1596 (C=C), 1653 (C=O)  $\text{cm}^{-1}$ .

$^1\text{H}$  NMR (400.13 MHz,  $\text{CDCl}_3$ ):  $\delta$  7.85 (d,  $^3J_{3,4} = 4.0$  Hz, 2H, 2 H-3), 7.53 (m, 4H,  $\text{H}_o$  from 2 Ph), 7.43 (m, 2H,  $\text{H}_p$  from 2 Ph), 7.38 (d,  $^3J_{4',5'} = 5.1$  Hz, 2H, H-5'), 7.31 (m, 4H,  $\text{H}_m$  from 2 Ph), 7.22 (d,  $^3J_{3',5'} = 3.6$  Hz, 2H, H-3'), 7.09 (dd,  $^3J_{3',5'} = 3.6$  Hz,  $^3J_{4',5'} = 5.1$  Hz, 2H, 2 H-4'), 6.79 (s, 2H, 2 H-7), 6.56 (d,  $^3J_{3,4} = 4.0$  Hz, 2H, 2 H-4) ppm.

$^{13}\text{C}$  NMR (100.62 MHz,  $\text{CDCl}_3$ ):  $\delta$  187.8 (2 C-8), 139.3 (2  $\text{C}_i$  from 2 Ph), 135.4 (2 C-2), 133.9 (2 C-2'), 132.6 (2  $\text{C}_p$  from 2 Ph), 129.1 (2 C-5), 128.5 (4  $\text{C}_m$  from 2 Ph), 128.1 (4  $\text{C}_o$  from 2 Ph), 128.0 (2 C-4'), 127.8 (2 C-6), 127.7 (2 C-3'), 127.2 (2 C-5'), 118.2 (2 C-3), 116.5 (2 C-4), 113.8 (2 C-7) ppm.

Elemental analysis for  $\text{C}_{34}\text{H}_{22}\text{N}_2\text{O}_2\text{S}_2$  (554.68): calcd. C, 73.62; H, 4.00; N, 5.05; S, 11.56; found: C, 73.58; H, 3.89; N, 5.16; S, 11.73.

(2*E*,2'*E*)-2,2'-(3,8-bis(4-fluorophenyl)-5*H*,10*H*-dipyrrolo[1,2-*a*:1',2'-*d*]pyrazine-5,10-diylidene)bis(1-phenylethan-1-one) (**2g**)

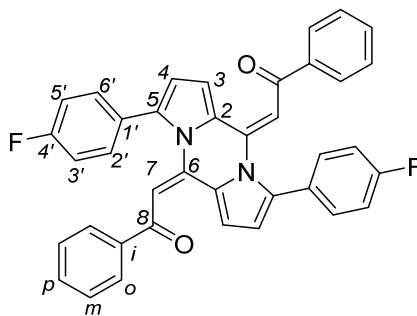

Analogously from benzoylethynylpyrrole **1g** (145 mg, 0.5 mmol) and 1-methylimidazole (41 mg, 0.5 mmol), (40-45 °C, 144 h) dipyrrolo[1,2-*a*:1',2'-*d*]pyrazine **2g** was obtained (30 mg, 21%) as a dark-orange gum.

IR (microlayer): 1544, 1579, 1599 (C=C), 1653 (C=O) cm<sup>-1</sup>.

<sup>1</sup>H NMR (400.13 MHz, CDCl<sub>3</sub>): δ 7.89 (d, <sup>3</sup>J<sub>3,4</sub> = 3.6 Hz, 2H, 2 H-3), 7.52 (m, 4H, 2 H<sub>o</sub> from 2 Ph), 7.42 (m, 6H, H<sub>p</sub>, 2 H-2',6' from 2 Ph), 7.29 (m, 4H, 2 H<sub>m</sub> from 2 Ph), 7.15 (m, 4H, 2 H-3',5' from 2 Ph), 6.49 (d, <sup>3</sup>J<sub>3,4</sub> = 3.6 Hz, 2H, 2 H-4), 6.47 (s, 2H, 2 H-7) ppm.

<sup>13</sup>C NMR (100.62 MHz, CDCl<sub>3</sub>): δ 187.6 (2 C-8), 162.8 (d, <sup>1</sup>J<sub>CF</sub> = 247.5 Hz, 2 C-4'), 139.2 (2 C<sub>i</sub> from 2 Ph), 135.72 (2 C-2), 135.67 (2 C-5), 132.6 (2 C<sub>p</sub> from 2 Ph), 130.6 (d, <sup>3</sup>J<sub>CF</sub> = 8.1 Hz, 4 C-2'), 128.8 (d, <sup>4</sup>J<sub>CF</sub> = 3.1 Hz, 2 C-1'), 128.6 (4 C<sub>m</sub> from 2 Ph), 128.0 (4 C<sub>o</sub> from 2 Ph), 127.5 (2 C-6), 118.6 (2 C-3), 116.4 (d, <sup>2</sup>J<sub>CF</sub> = 21.57 Hz, 4 C-3'), 115.4 (2 C-4), 114.3 (2 C-7) ppm.

<sup>19</sup>F NMR (376.5 MHz, CDCl<sub>3</sub>): δ -122.5 ppm.

Elemental analysis for C<sub>38</sub>H<sub>24</sub>F<sub>2</sub>N<sub>2</sub>O<sub>2</sub> (578.62): calcd. C, 78.88; H, 4.18; F, 6.57; N, 4.84; found: C, 78.74; H, 4.39; N, 5.13.

(2*E*,2'*E*)-2,2'-(3,8-bis(4-chlorophenyl)-5*H*,10*H*-dipyrrolo[1,2-*a*:1',2'-*d*]pyrazine-5,10-diylidene)bis(1-phenylethan-1-one) (**2h**)

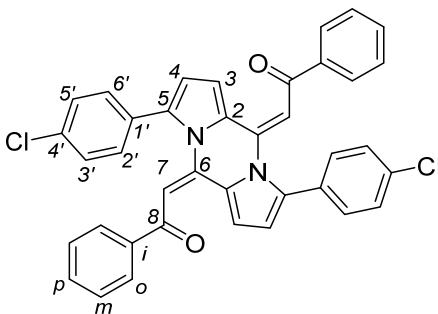

Analogously from benzoylethynylpyrrole **1h** (153 mg, 0.5 mmol) and 1-methylimidazole (41 mg, 0.5 mmol), (40-45 °C, 72 h) dipyrrolo[1,2-*a*:1',2'-*d*]pyrazine **2h** was obtained (28 mg, 18%) as a brown gum.

IR (microlayer): 1541, 1579, 1597 (C=C), 1652 (C=O)  $\text{cm}^{-1}$ .

$^1\text{H}$  NMR (400.13 MHz,  $\text{CDCl}_3$ ):  $\delta$  7.88 (d,  $^3J_{3,4} = 4.0$  Hz, 2H, 2 H-3), 7.49-7.39 (m, 12H, 2  $\text{H}_{o,m}$ , 2 H-3',5' from 2 Ph), 7.33-7.29 (m, 6H, 2  $\text{H}_p$ , 2 H-2',6' from 4 Ph), 6.53 (d,  $^3J_{3,4} = 4.0$  Hz, 2H, 2 H-4), 6.46 (s, 2H, 2 H-7) ppm.

$^{13}\text{C}$  NMR (100.62 MHz,  $\text{CDCl}_3$ ):  $\delta$  187.7 (2 C-8), 139.2 (2  $\text{C}_i$  from 2 Ph), 135.5 (2 C-2), 135.4 (2 C-1'), 134.4 (2 C-4'), 132.7 (2  $\text{C}_p$  from 2 Ph), 131.2 (2 C-5), 130.0 (2 C-2',6' from 2 Ar), 129.6 (2  $\text{C}_m$  from 2 Ph), 128.6 (2 C-3',5' from 2 Ar), 128.0 (2  $\text{C}_o$  from 2 Ph), 127.8 (2 C-6), 118.5 (2 C-3), 115.7 (2 C-4), 114.5 (2 C-7) ppm.

Elemental analysis for  $\text{C}_{38}\text{H}_{24}\text{Cl}_2\text{N}_2\text{O}_2$  (611.52): calcd. C, 74.64; H, 3.96; Cl, 11.59; N, 4.58; found: C, 74.85; H, 4.03; Cl, 11.62; N, 4.43.

(2*E*,2'*E*)-2,2'-(1,2,3,4,8,9,10,11-octahydro-6*H*,13*H*-pyrazino[1,2-*a*:4,5-*a'*]diindole-6,13-diylidene)bis(1-(thiophen-2-yl)ethan-1-one) (**2i**)

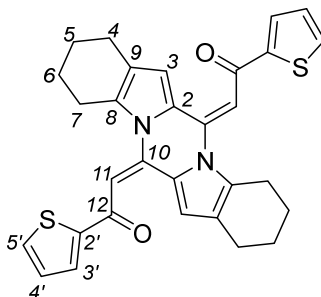

Analogously from benzoylethynyltetrahydroindole **1i** (128 mg, 0.5 mmol) and 1-methylimidazole (41 mg, 0.5 mmol), (40-45  $^{\circ}\text{C}$ , 144 h) dipyrrolo[1,2-*a*:1',2'-*d'*]pyrazine **2i** was obtained (18 mg, 14%) as an orange powder, mp 213-215  $^{\circ}\text{C}$ .

IR (microlayer): 1555, 1580 (C=C), 1627 (C=O)  $\text{cm}^{-1}$ .

$^1\text{H}$  NMR (400.13 MHz,  $\text{CDCl}_3$ ):  $\delta$  7.88 (s, 2H, 2 H-3), 7.62 (d,  $^3J = 3.6$  Hz, 2H, 2 H-3' from 2 thienyl), 7.54 (d,  $^3J = 4.9$  Hz, 2H, 2 H-5' from 2 thienyl), 7.08 (m, 2H, 2 H-4' from 2 thienyl), 6.68 (s, 2H, 2 H-11), 2.90 (m, 4H, 2 H-7), 2.60 (m, 4H, 2 H-4), 1.80 (m, 8H, 2 H-5, 2 H-6) ppm.

$^{13}\text{C}$  NMR (100.62 MHz,  $\text{CDCl}_3$ ):  $\delta$  179.5 (2 C-12), 147.8 (2 C-2'), 137.3 (2 C-8), 132.7 (2 C-5' from thienyl), 132.5 (2 C-2), 130.5 (2 C-3' from thienyl), 128.3 (2 C-4' from thienyl), 124.0 (2 C-10), 123.8 (2 C-9), 119.3 (2 C-3), 107.0 (2 C-11), 26.9 (2 C-7), 24.1 (2 C-6), 23.2 (2 C-5), 22.8 (2 C-4) ppm.

Elemental analysis for  $\text{C}_{30}\text{H}_{26}\text{N}_2\text{O}_2\text{S}_2$  (510.67): calcd. C, 70.56; H, 5.13; N, 5.49; S, 12.56; found: C, 70.44; H, 5.03; N, 5.33; S, 12.37.

## References

1. B. A. Trofimov, Z. V. Stepanova, L. N. Sobenina, A. I. Mikhaleva, I. A. Ushakov, Ethynylation of pyrroles with 1-acyl-2-bromoacetylenes on alumina: a formal inverse Sonogashira coupling. *Tetrahedron Lett.*, 2004, **45**, 6513-6516.



**Chemical structure of compound 10:** O=C1C(=Cc2cnc3c2cnc3C(=O)Cc4ccccc4)cc5ccccc15

**<sup>1</sup>H NMR spectrum (CDCl<sub>3</sub>):**

| Chemical Shift (ppm) | Integration |
|----------------------|-------------|
| 8.47                 | 0.12        |
| 8.31                 | 0.34        |
| 8.18                 | 1.57        |
| 8.17                 | 0.44        |
| 8.15                 | 0.44        |
| 8.14                 | 0.44        |
| 7.97                 | 5.13        |
| 7.54                 | 2.73        |
| 7.53                 | 7.11        |
| 7.51                 | 3.04        |
| 7.47                 | 2.00        |
| 7.45                 | 0.49        |
| 7.43                 | 0.49        |
| 7.23                 | 3.04        |
| 6.94                 | 2.00        |
| 6.92                 | 0.49        |
| 6.88                 | 0.49        |
| 6.85                 | 0.49        |
| 6.46                 | 2.00        |
| 6.35                 | 0.49        |
| 6.34                 | 0.49        |

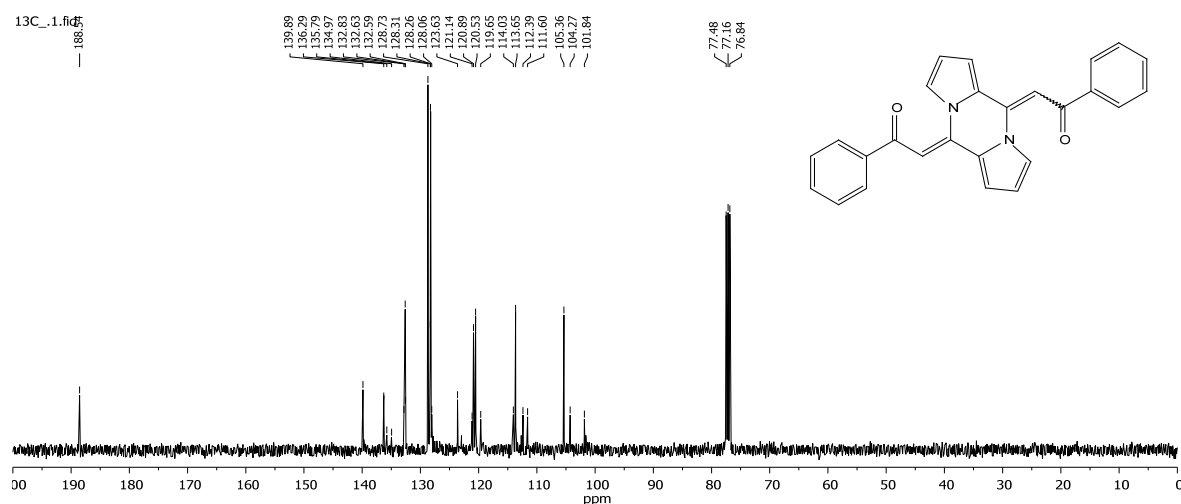

**Figure S2.**  $^{13}\text{C}$  NMR spectrum of compound **2a** (100.62 MHz,  $\text{CDCl}_3$ ).

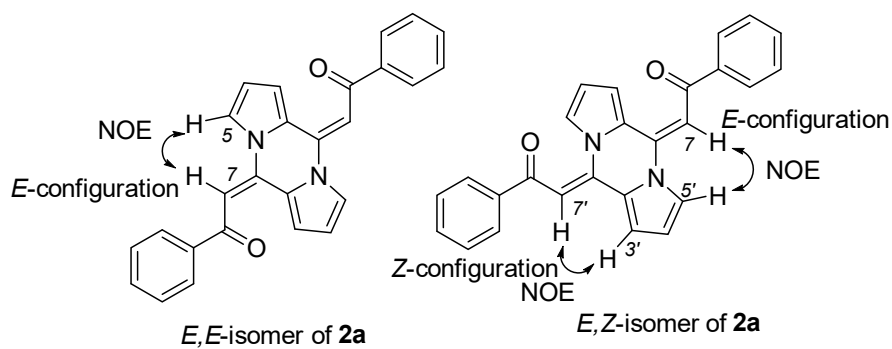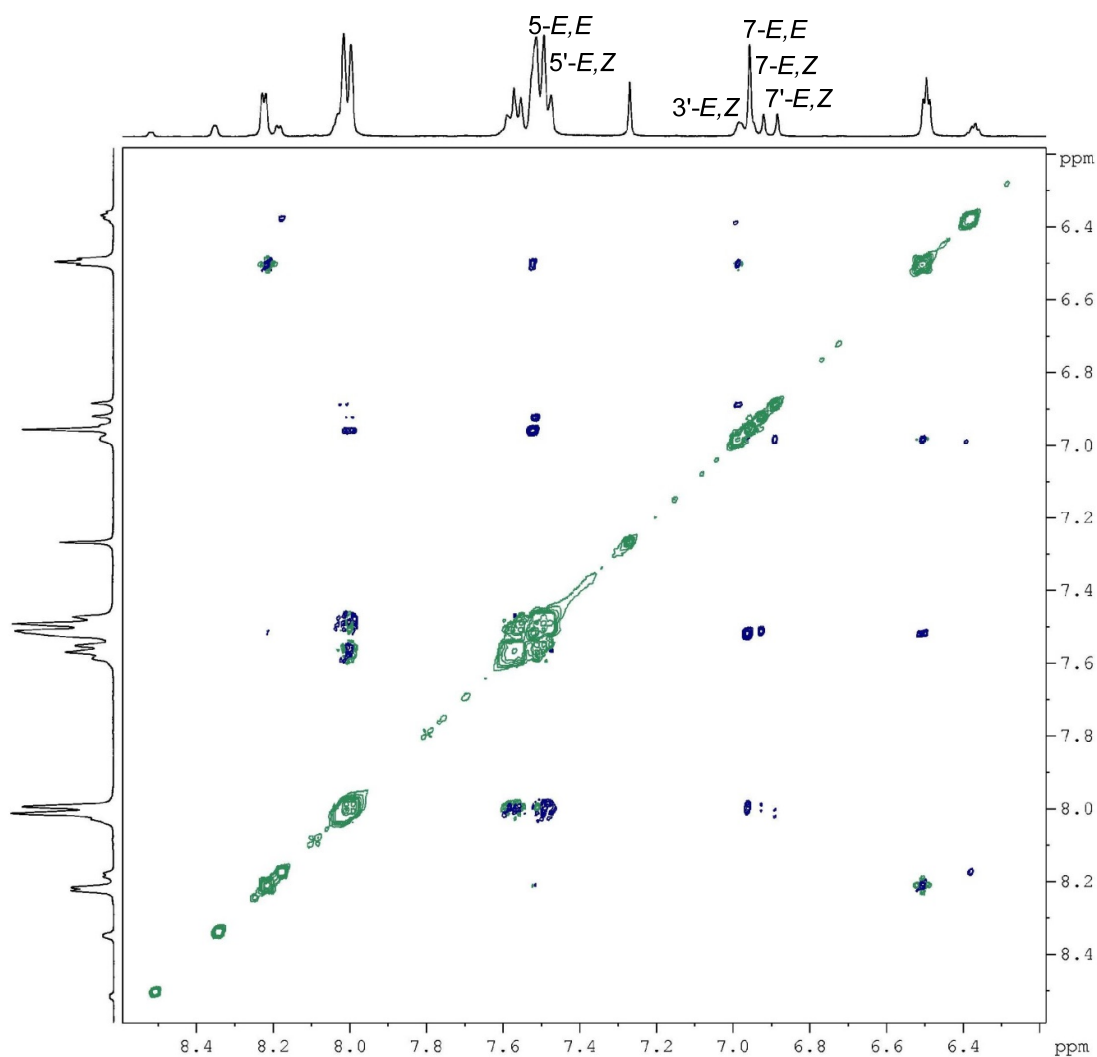

**Figure S3.** 2D NMR NOESY spectrum of compound **2a** (400.13 MHz, CDCl<sub>3</sub>).

The 5-*E,E* and 5'-*E,Z* signals of *E,E*- and *E,Z*-isomers of compound **2a** are overlapped with the H<sub>m</sub> and H<sub>m</sub>' signals.

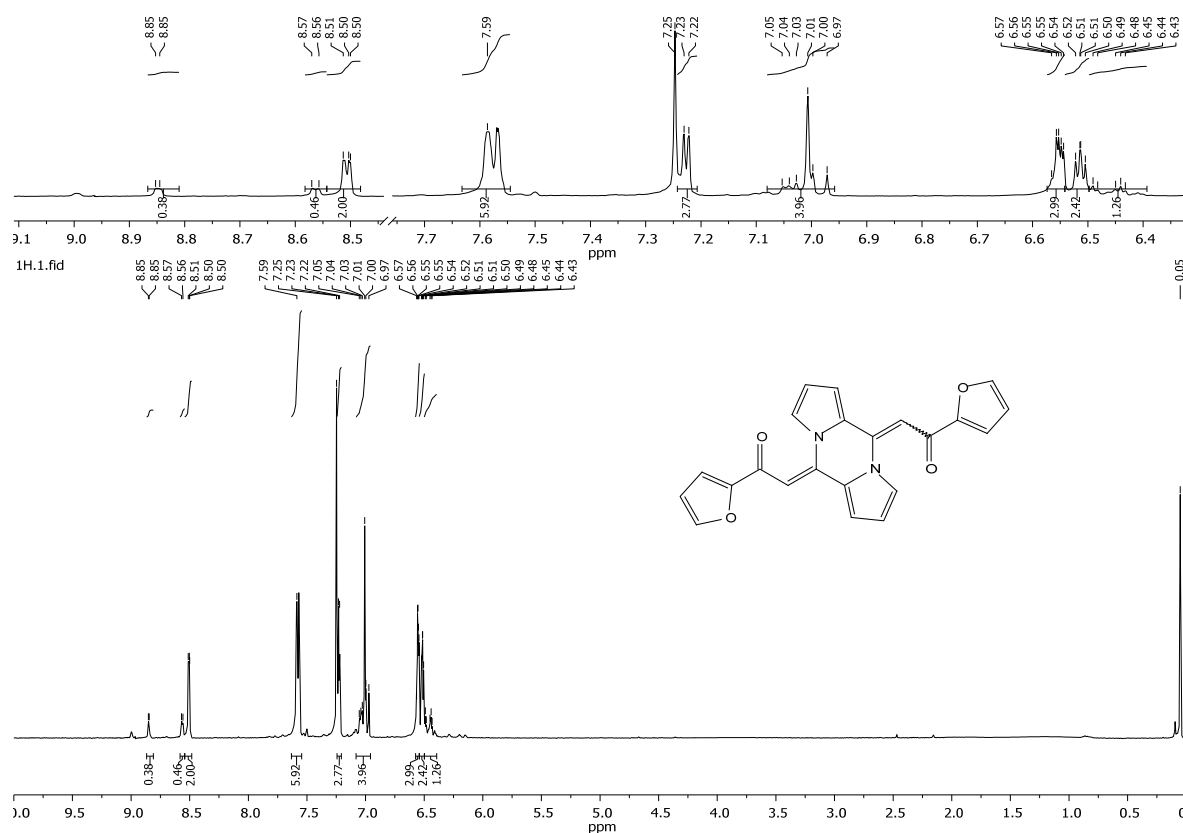

**Figure S4.  $^1\text{H}$  NMR spectrum of compound **2b** (400.13 MHz,  $\text{CDCl}_3$ ).**

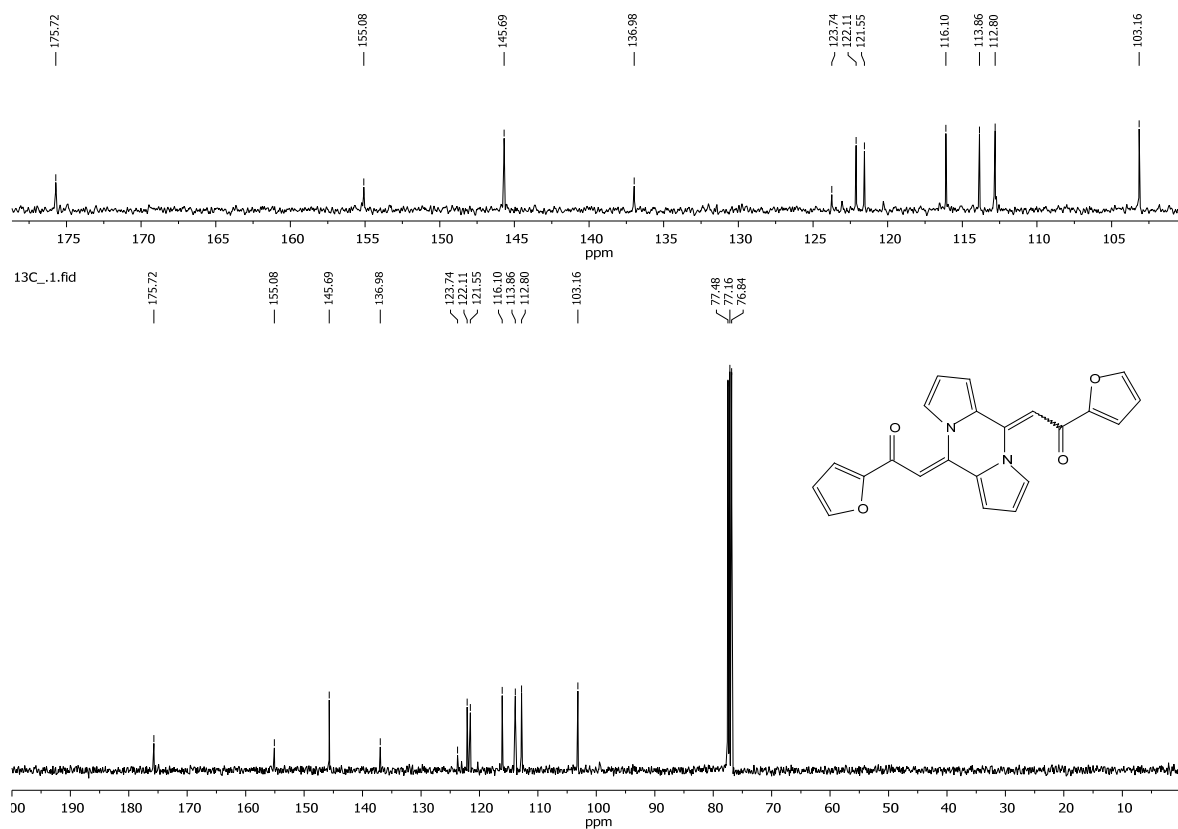

**Figure S5.  $^{13}\text{C}$  NMR spectrum of compound **2b** (100.62 MHz,  $\text{CDCl}_3$ ).**

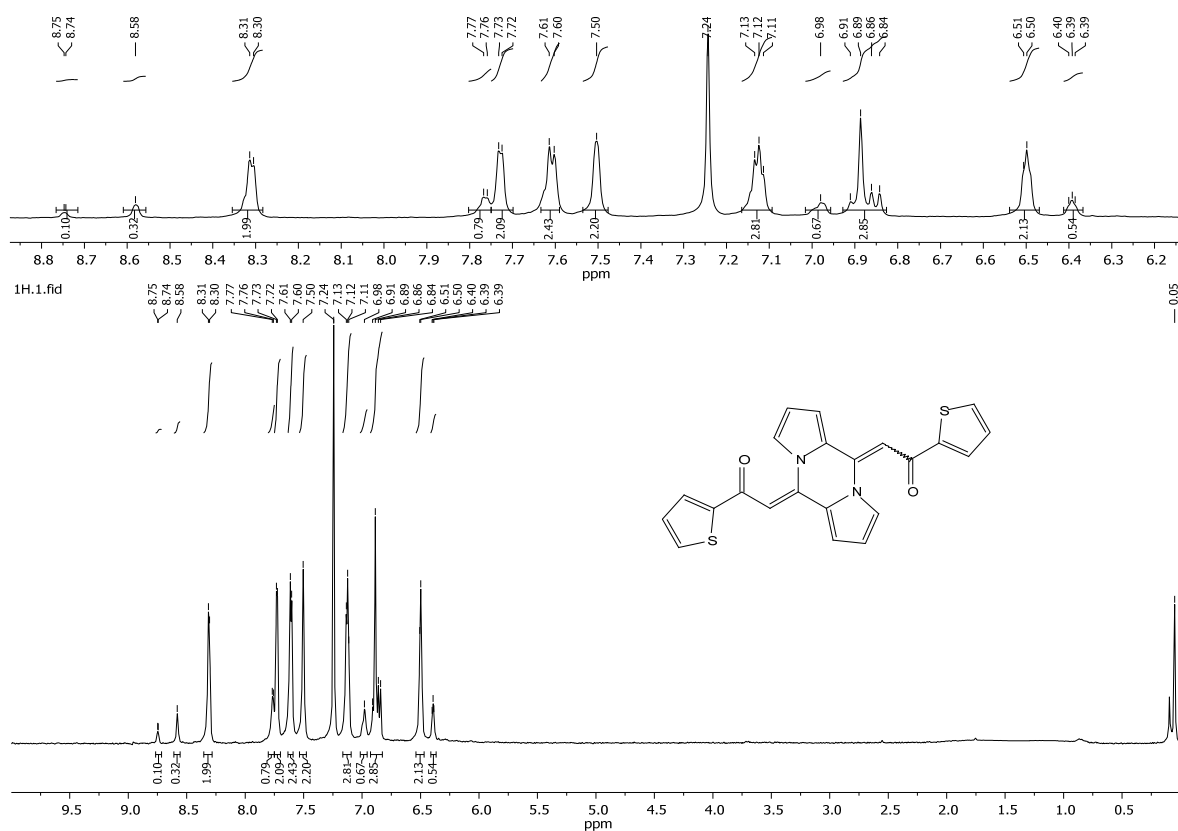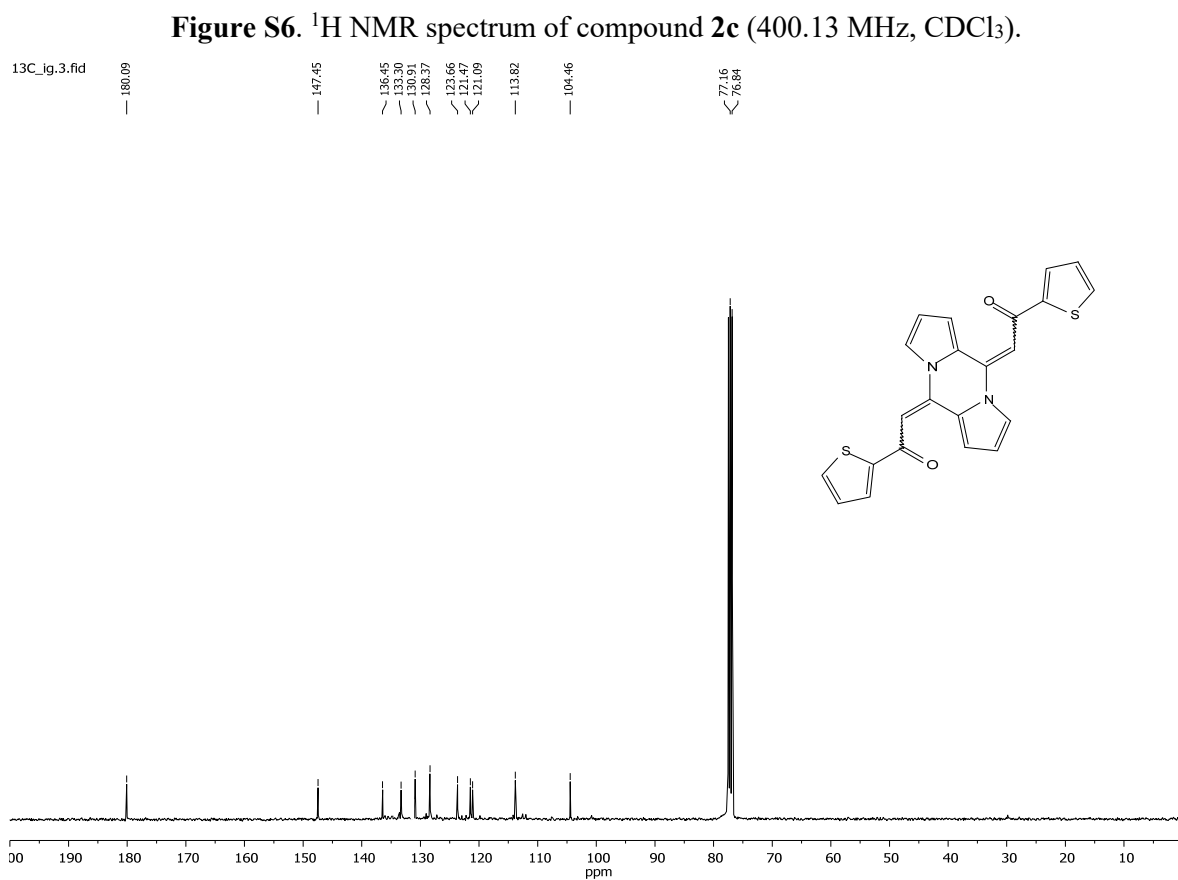

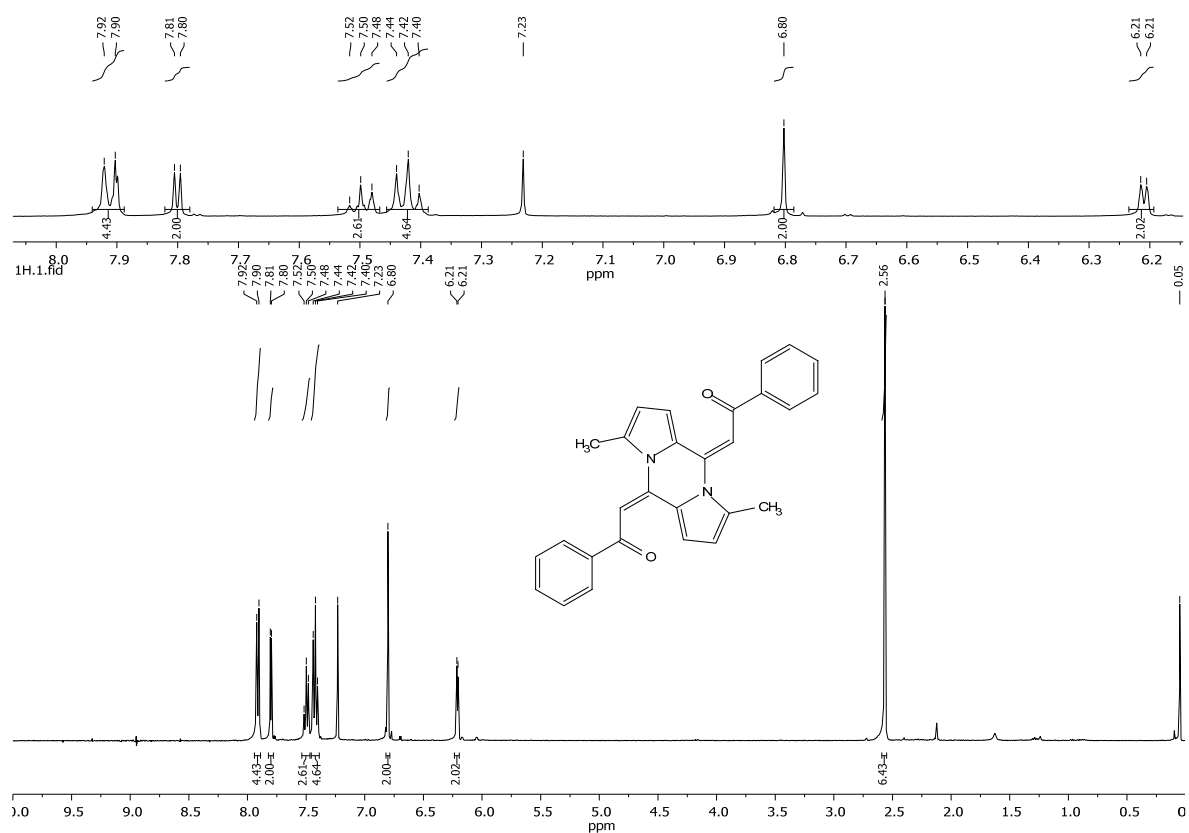

**Figure S8.** <sup>1</sup>H NMR spectrum of compound **2d** (400.13 MHz, CDCl<sub>3</sub>).

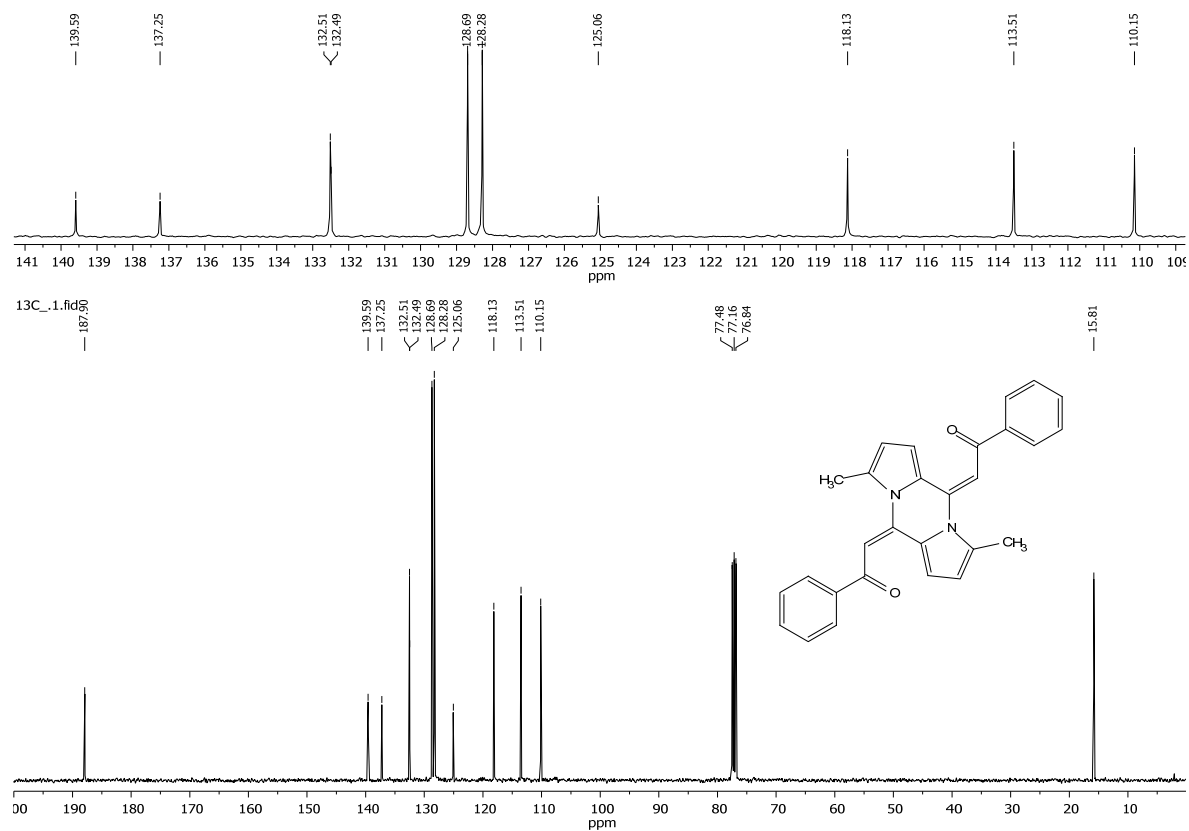

**Figure S9.** <sup>13</sup>C NMR spectrum of compound **2d** (100.62 MHz, CDCl<sub>3</sub>).

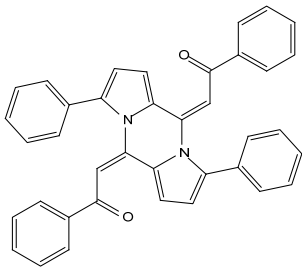

13C NMR spectra of compound 10. The top spectrum is the <sup>13</sup>C NMR spectrum in CDCl<sub>3</sub>, showing peaks from 113.98 to 139.51 ppm. The bottom spectrum is the <sup>13</sup>C NMR spectrum in DMSO-d<sub>6</sub>, showing peaks from 117.16 to 187.67 ppm. The chemical structure of compound 10 is shown on the right.

**Figure S11.**  $^{13}\text{C}$  NMR spectrum of compound **2e** (100.62 MHz,  $\text{CDCl}_3$ ).

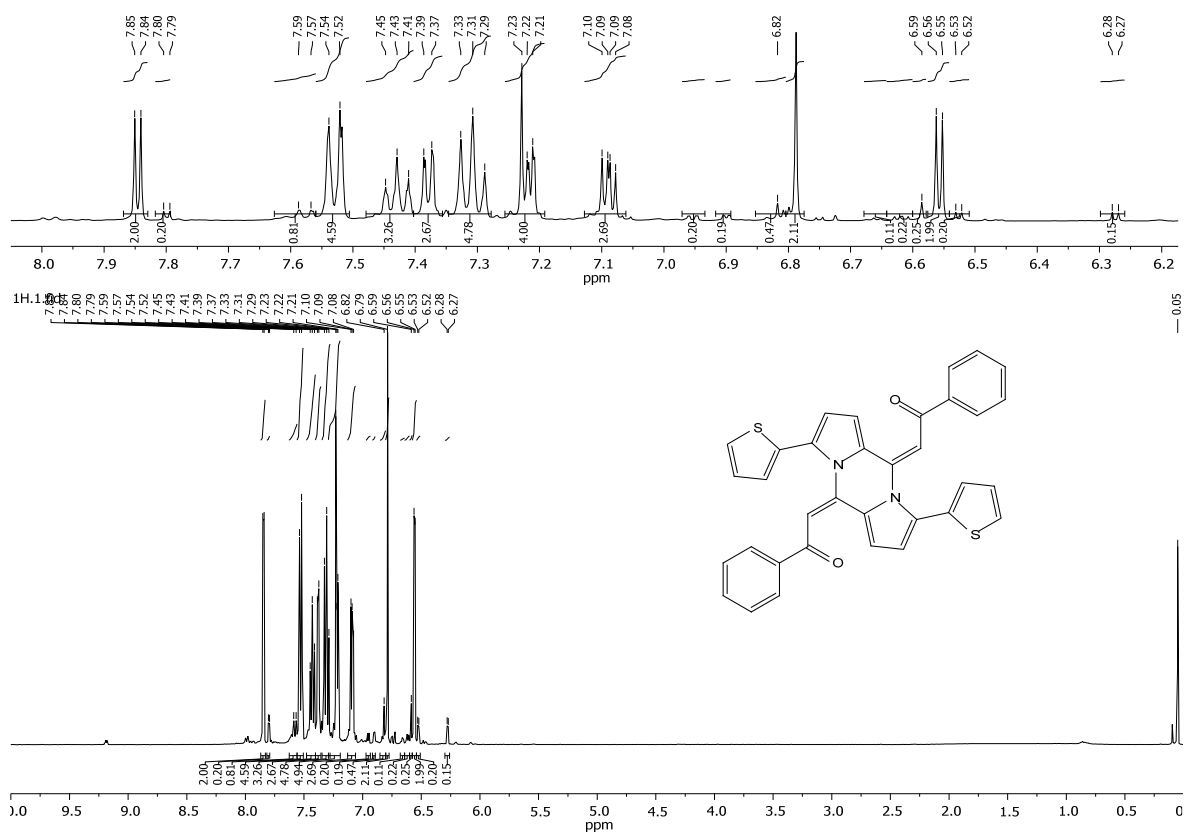

**Figure S12.**  $^1\text{H}$  NMR spectrum of compound **2f** (400.13 MHz,  $\text{CDCl}_3$ ).

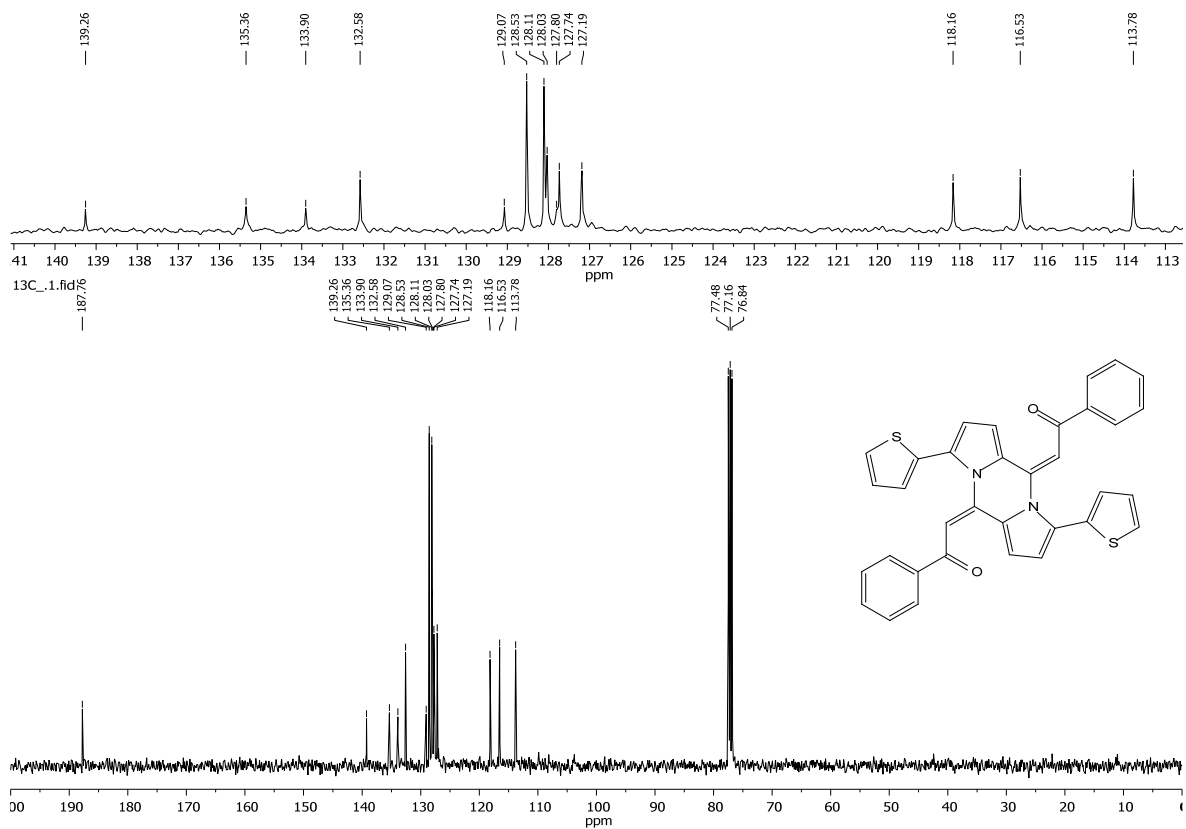

**Figure S13.**  $^{13}\text{C}$  NMR spectrum of compound **2f** (100.62 MHz,  $\text{CDCl}_3$ ).

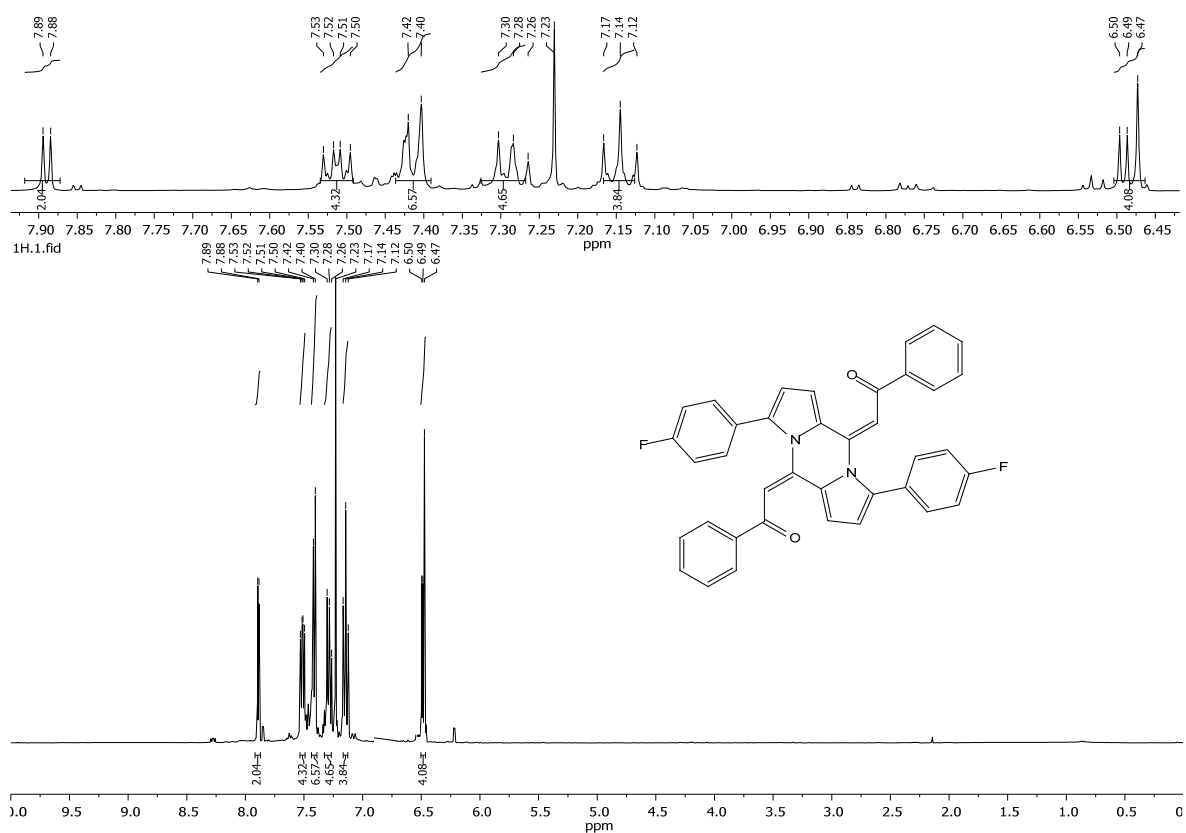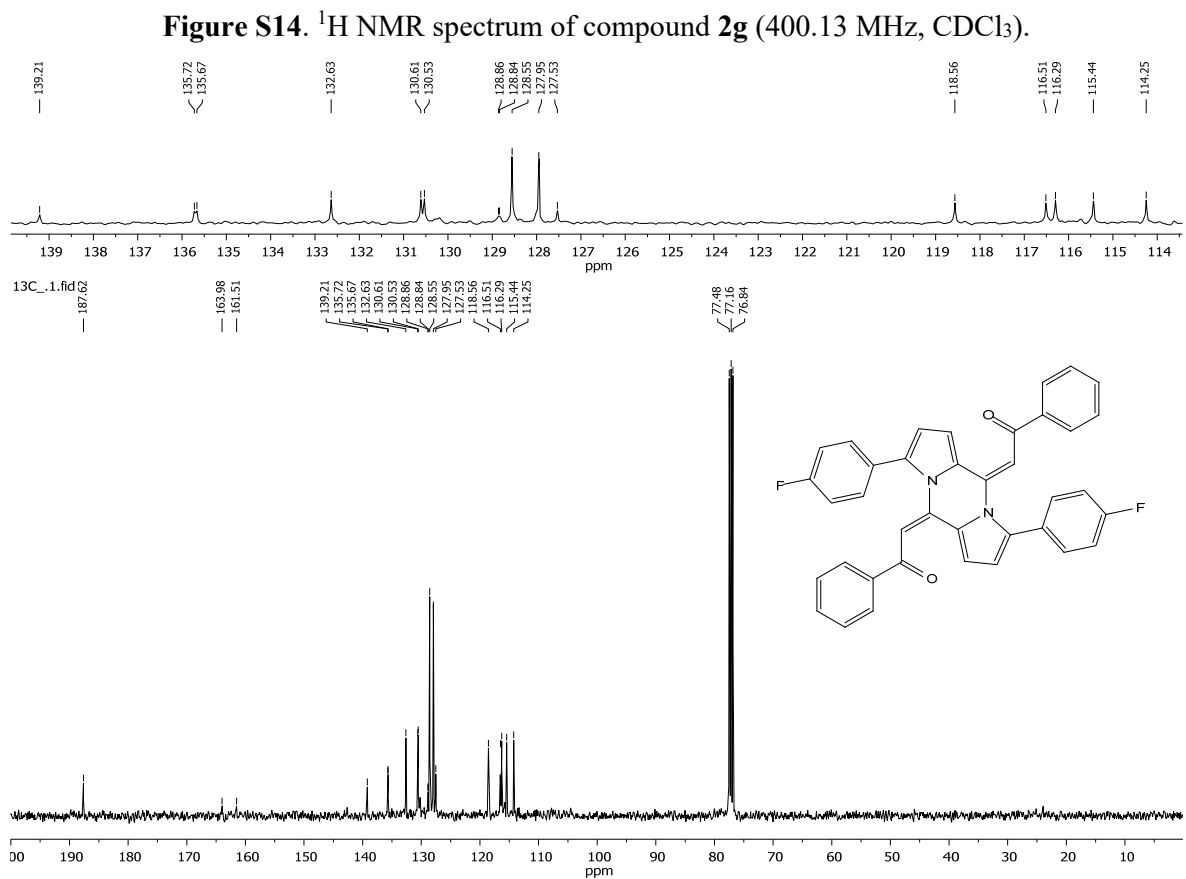



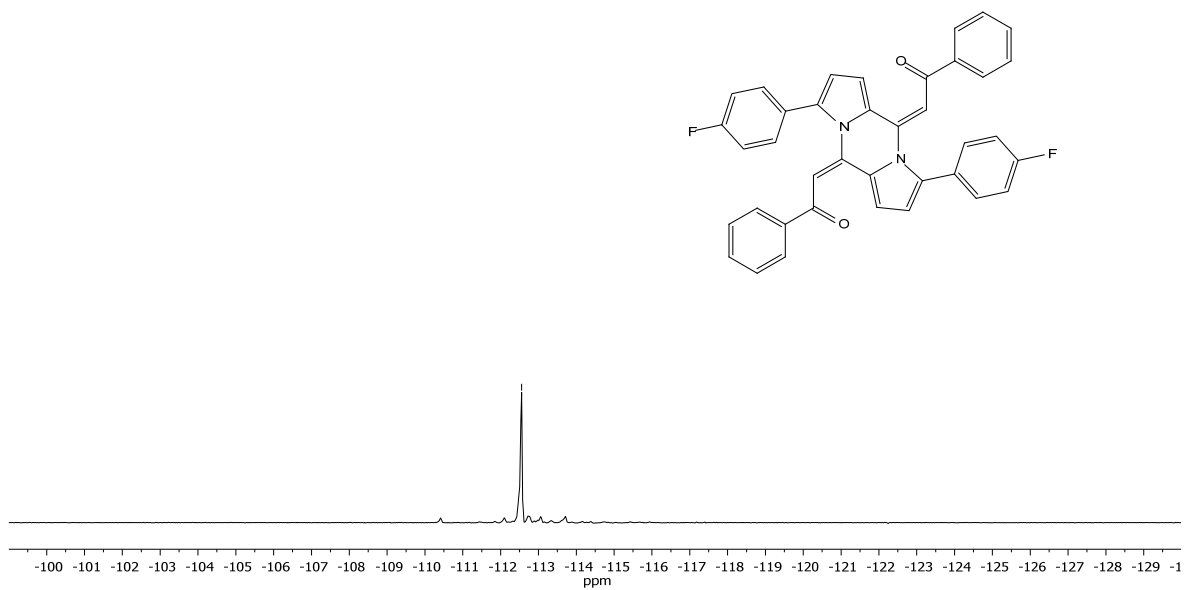

**Figure S16.**  $^{19}\text{F}$  NMR spectrum of compound **2g** (376.5 MHz,  $\text{CDCl}_3$ ).

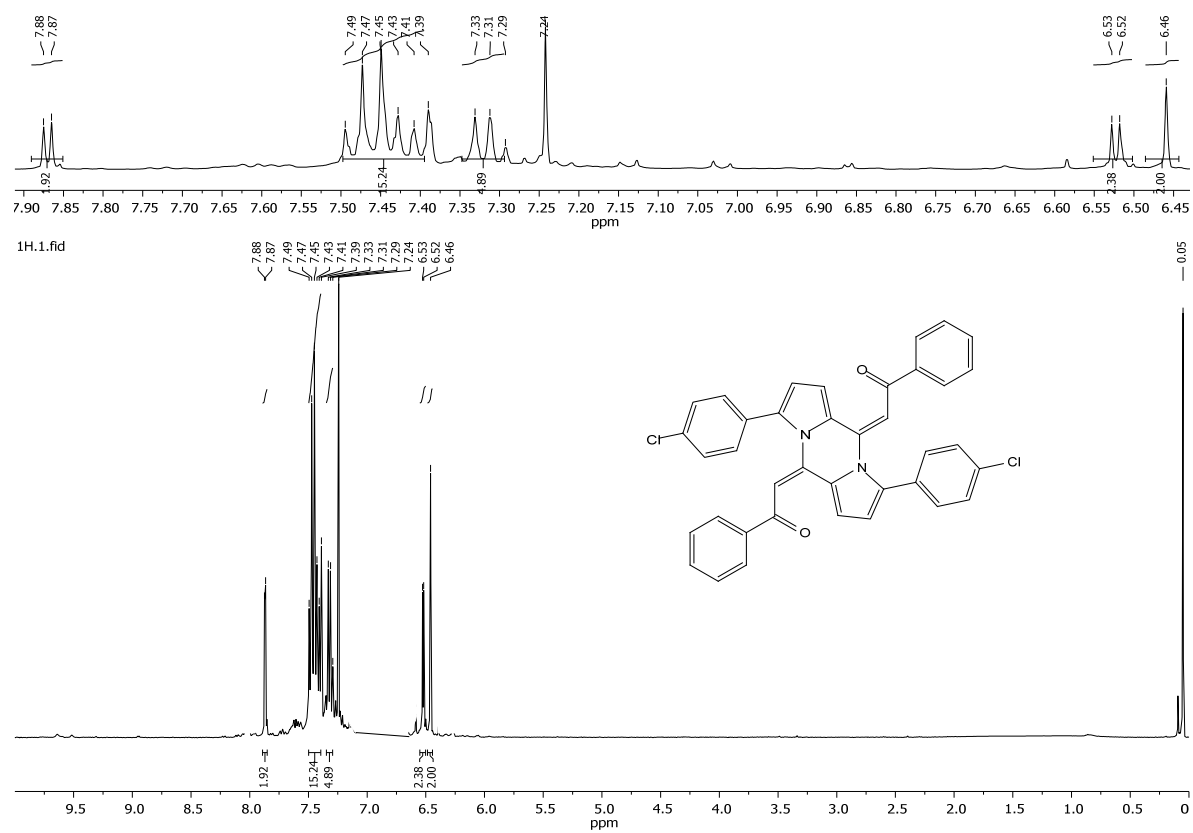

**Figure S17.**  $^1\text{H}$  NMR spectrum of compound **2h** (400.13 MHz,  $\text{CDCl}_3$ ).

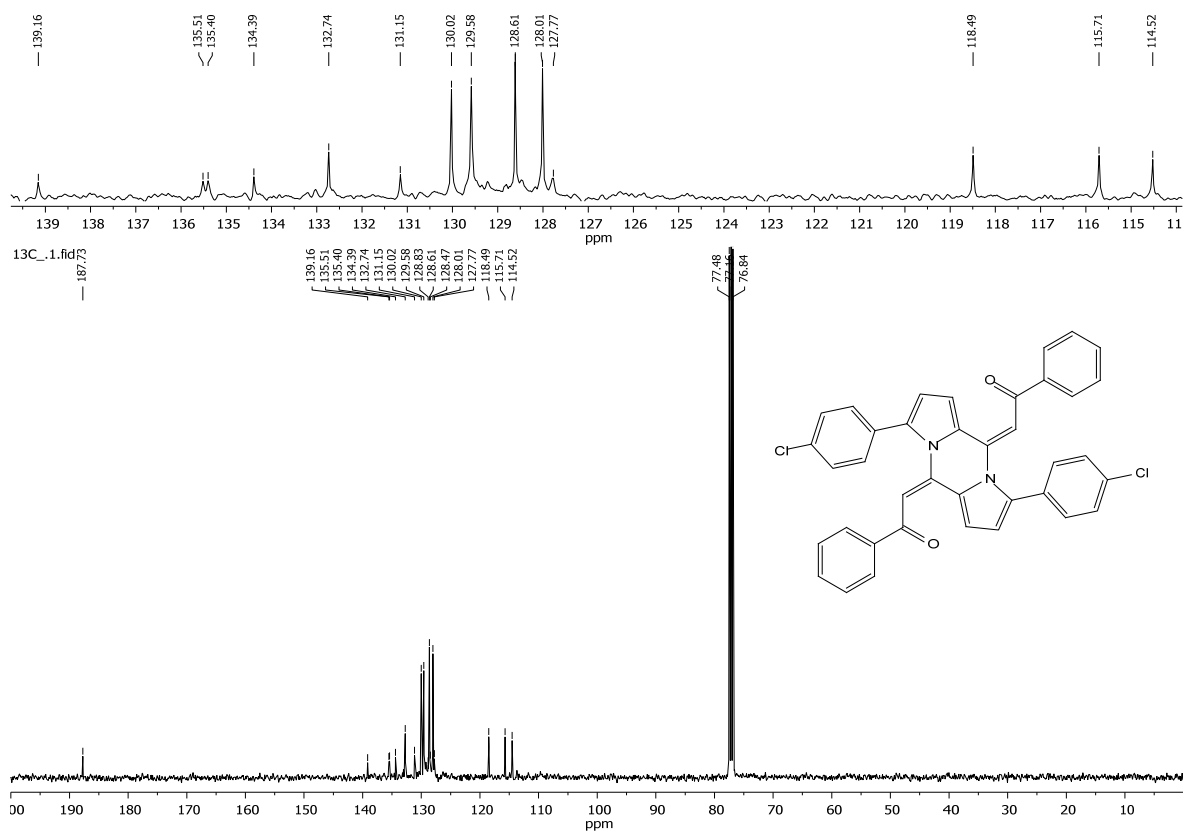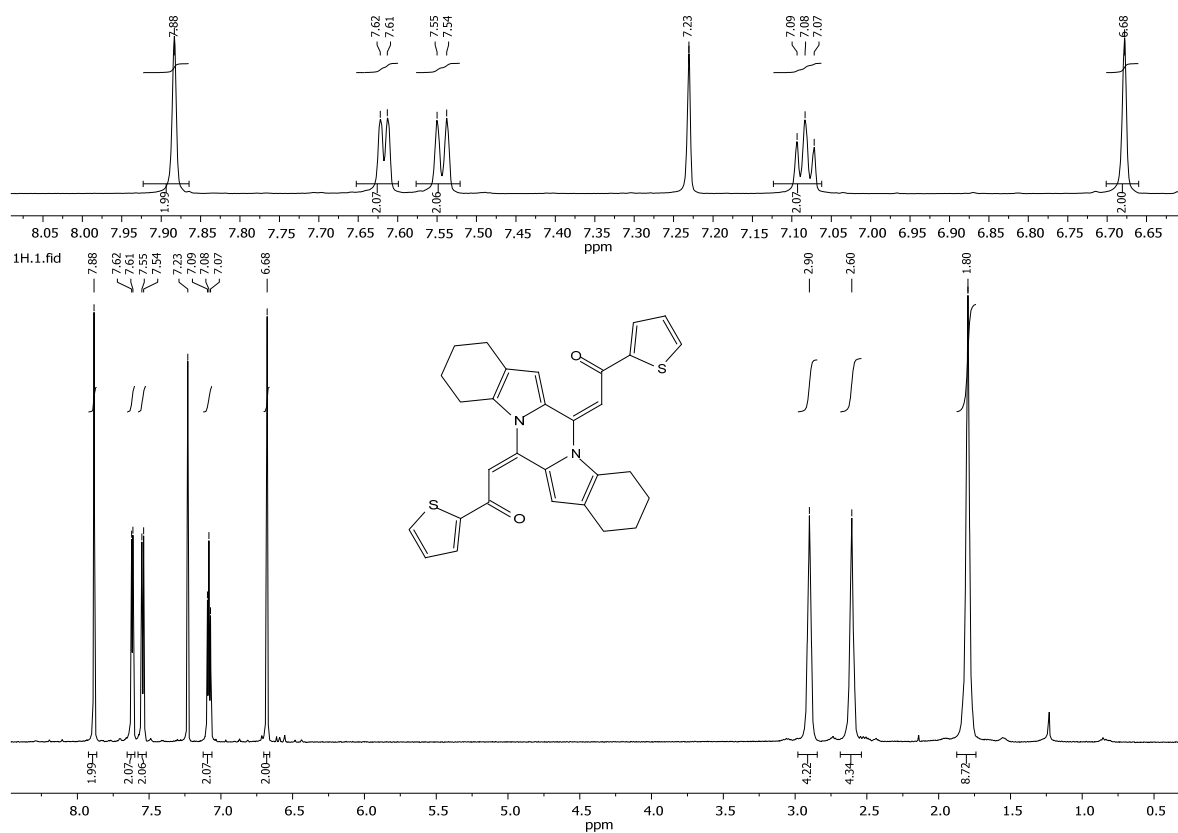

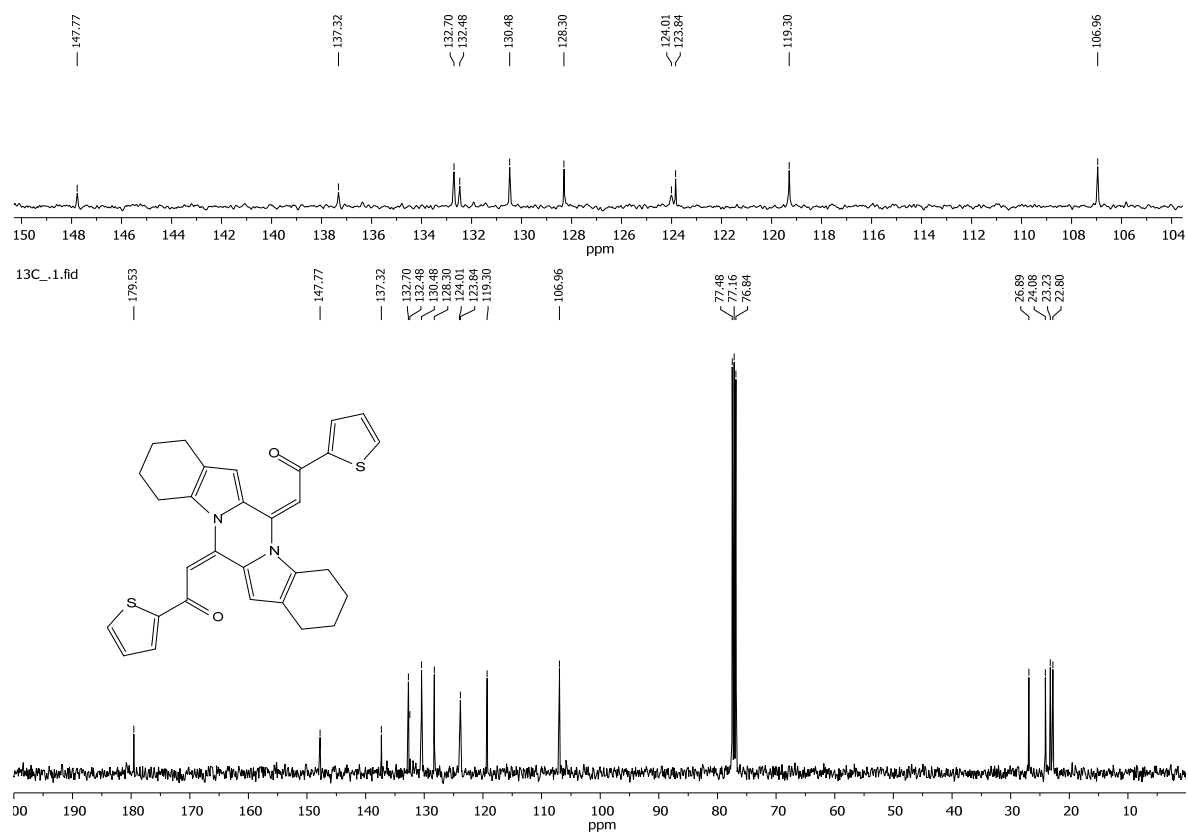

**Figure S20.** <sup>13</sup>C NMR spectrum of compound **2i** (100.62 MHz, CDCl<sub>3</sub>).

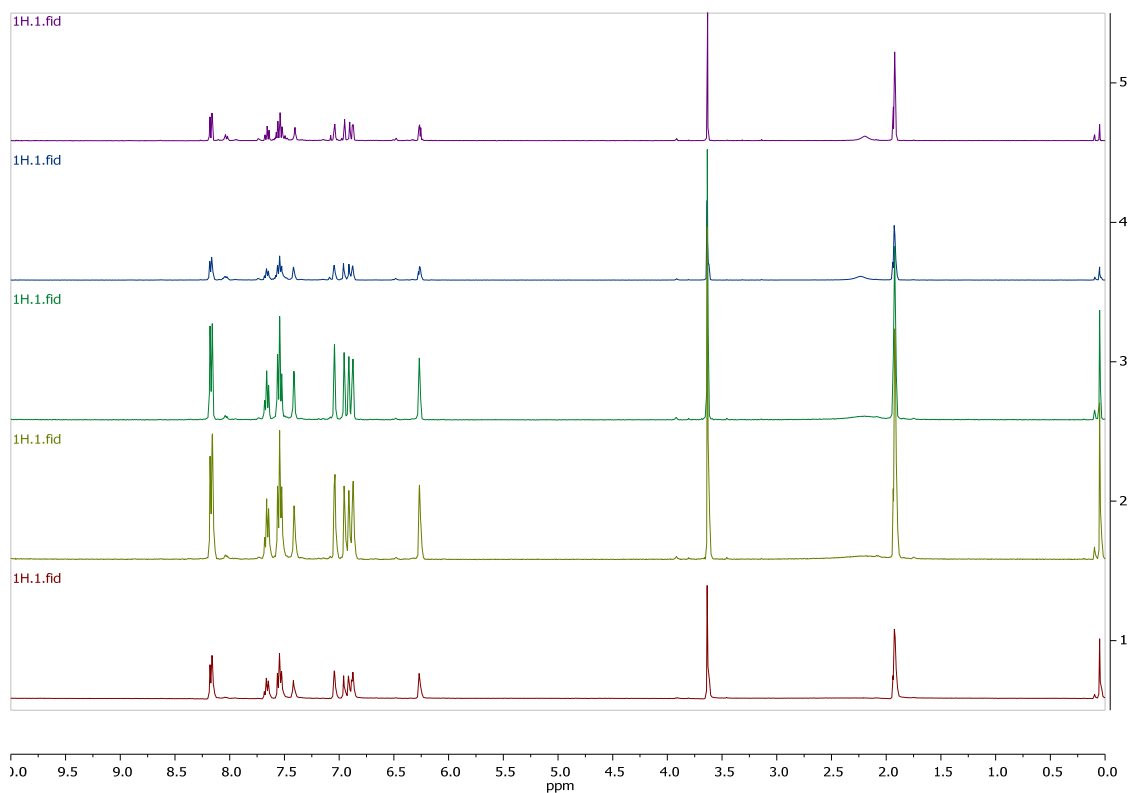

**Figure S21.** <sup>1</sup>H NMR monitoring of the reaction mixture between benzoylethynylpyrrole **1a** and 1-methylimidazole (1:1, 40 °C) (CD<sub>3</sub>CN, 400.13 MHz).

1. Reaction mixture after 0.5 h
2. Reaction mixture after 2 h
3. Reaction mixture after 6 h
4. Reaction mixture after 96 h
5. Reaction mixture after 144 h
